# Supplementary material
Source: PubMed Central journal article supplement (PMC3347773)
Supplement: NIHMS363077-supplement-1.pdf [file NIHMS363077-supplement-1.pdf]

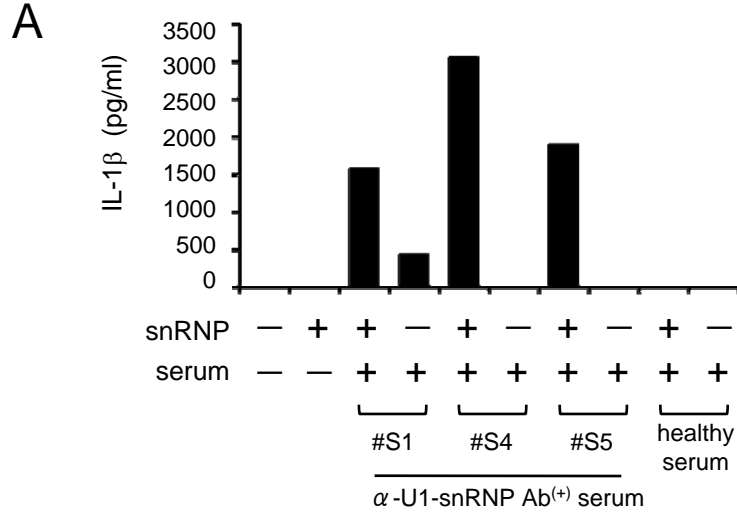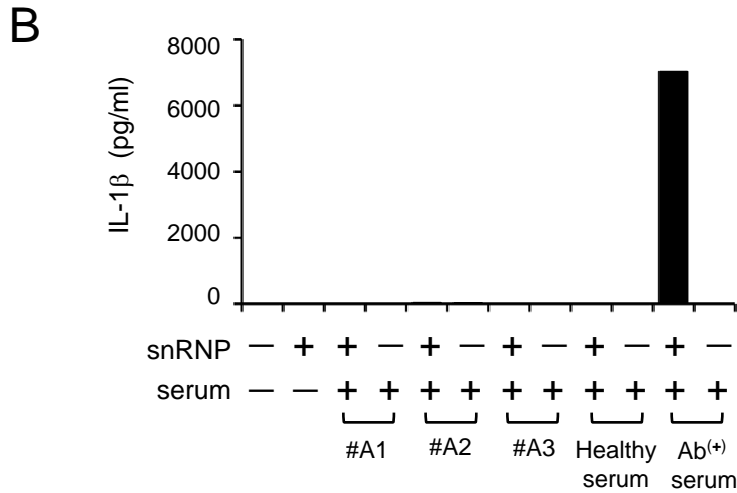

**Supplemental Fig. 1. U1-snRNP induces IL-1 $\beta$  production from human monocytes in an autoantibody-dependent manner.** IL-1 $\beta$  ELISA at 18 hours from culture supernatants of monocytes incubated in the following conditions. **(A)** Monocytes from a single donor were incubated with or without U1-snRNP (snRNP, 5  $\mu$ g/ml) in the presence or absence of anti-U1-snRNP (Ab<sup>(+)</sup>) serum (5% final concentration) from multiple donors (#S1, #S4 and #S5). **(B)** Monocytes from a single donor were treated with or without U1-snRNP in the presence or absence of healthy serum, anti-U1-snRNP (Ab<sup>(+)</sup>) serum or ANA-positive sera without anti-U1-snRNP antibodies (#A1- #A3). \* $P < 0.05$

**A**

3 hour stimulation

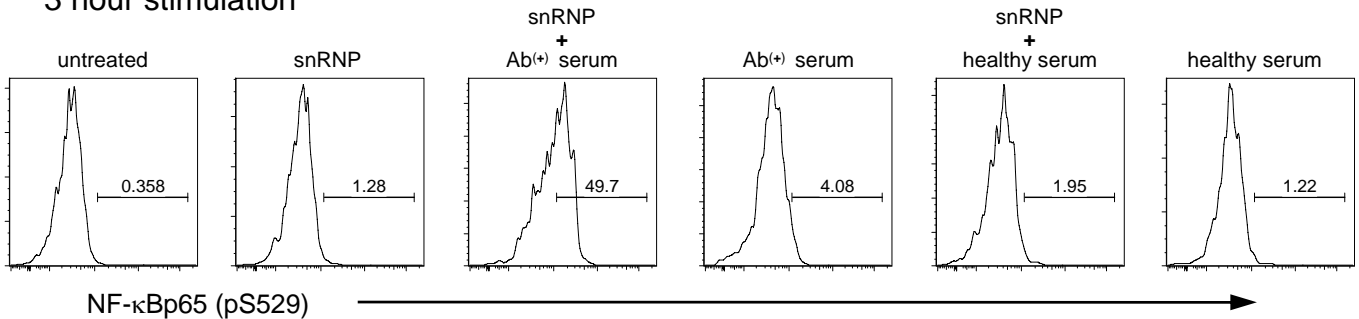**B**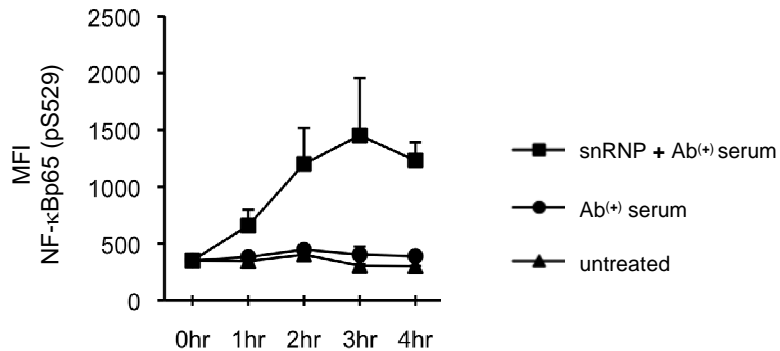

**Supplemental Fig. 2. U1-snRNP induces the activation of NF-κB in human monocytes in the presence of anti-U1-snRNP (Ab<sup>(+)</sup>) serum.** (A-B) Flow cytometric analysis of NF-κB activation in monocytes incubated for 0 - 4 hours with or without U1-snRNP (snRNP) in the presence or absence of healthy serum or anti-U1-snRNP (Ab<sup>(+)</sup>) serum. (A) Representative data from 3 independent experiments. (B) Symbols and error bars indicate mean + SD (n = 2). Numbers in histograms indicate the frequency of cells stained positive.

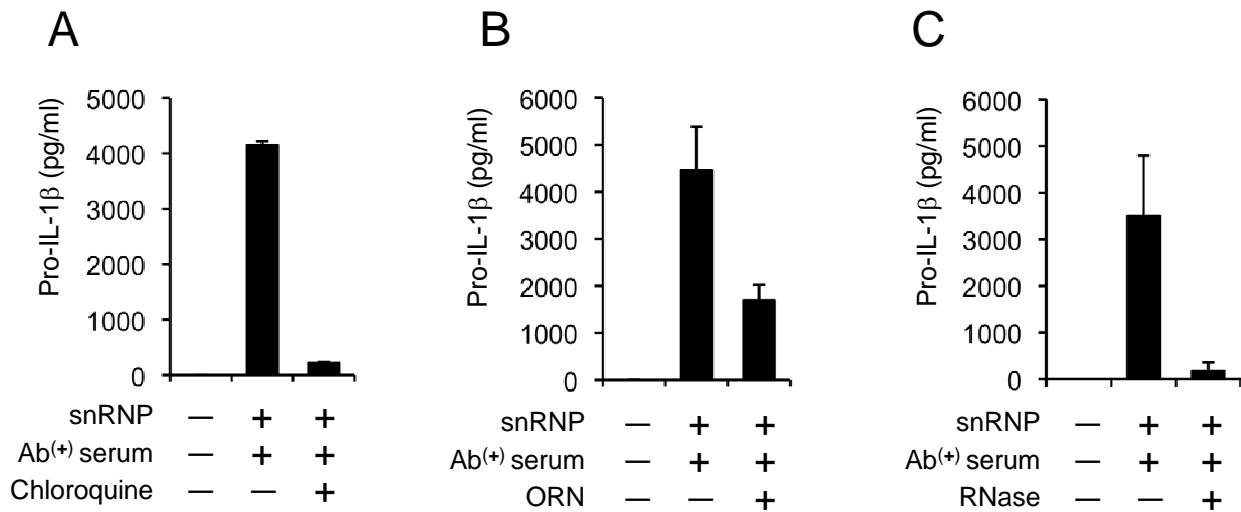

**Supplemental Fig. 3. Pro-IL-1 $\beta$  protein expression in monocytes treated with U1-snRNP and anti-U1-snRNP (Ab<sup>(+)</sup>) serum is decreased by endolysosomal inhibitor chloroquine, inhibitory nucleic acid sequences for TLR7/8 or RNase.** Pro-IL-1 $\beta$  ELISA of human monocytes incubated for 10 hours with U1-snRNP and anti-U1-snRNP (Ab<sup>(+)</sup>) serum in the presence or absence of the endolysosomal inhibitor chloroquine (**A**), inhibitory nucleic acid sequences for TLR7/8 (ORN, **B**) or RNase (**C**). Bars and error bars indicate mean and standard error of mean (SEM), respectively (n = 2-8 donors for A-C).

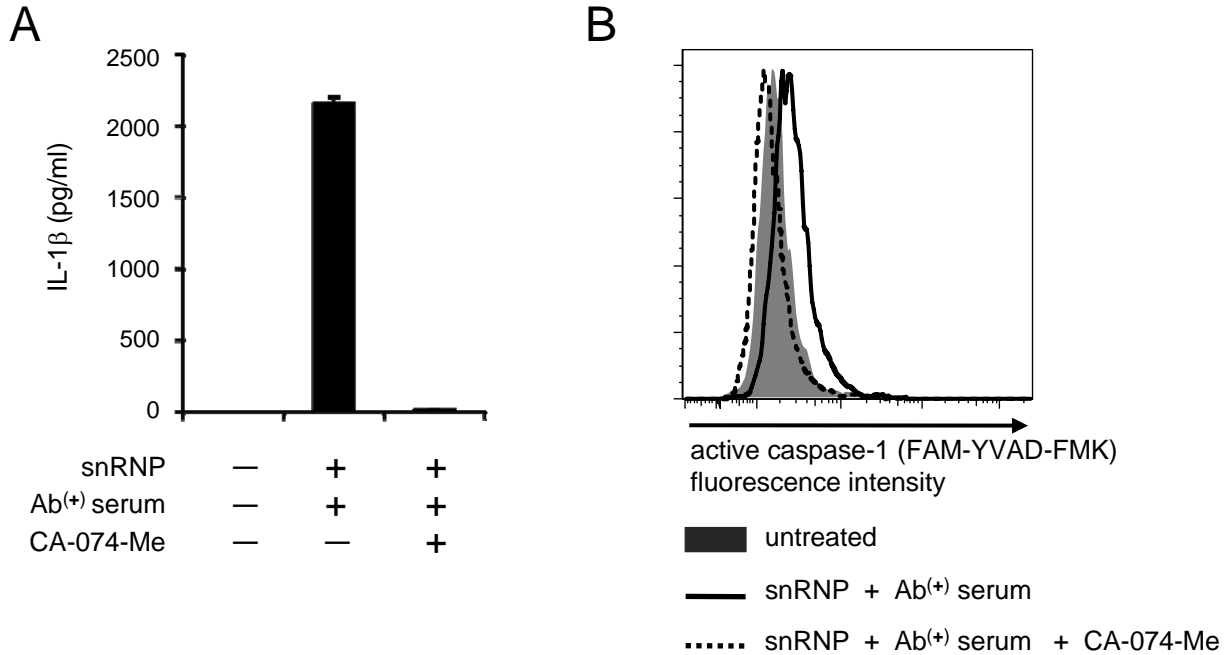

**Supplemental Fig. 4. Cathepsin B inhibitor CA-074-Me inhibits the activation of caspase-1 and IL-1 $\beta$  production from monocytes treated with U1-snRNP and anti-U1-snRNP (Ab<sup>(+)</sup>) serum. (A)** IL-1 $\beta$  ELISA of human monocytes incubated for 18 hours with U1-snRNP and anti-U1-snRNP (Ab<sup>(+)</sup>) serum in the presence or absence of CA-074-Me. Bars and error bars indicate mean and SEM, respectively (n = 8 donors). **(B)** Flow cytometric analysis of active caspase-1 in monocytes treated for 7 hours with U1-snRNP and anti-U1-snRNP (Ab<sup>(+)</sup>) serum in the presence or absence of CA-074-Me. Representative data from 3 independent experiments.
